# Supplementary material
Source: PubMed Central journal article supplement (PMC7946521)
Supplement: jcs-54-1-36-supple.pdf [file jcs-54-1-36-supple.pdf]

**Supplementary Table 1.** Causes of in-hospital death

| Variable                     | Survivors (n=33) | Non-survivors (n=41) | p-value |
|------------------------------|------------------|----------------------|---------|
| Survival discharge           | 17 (51.5)        |                      |         |
| Cause of death (in-hospital) | 16               | 41                   |         |
| Sepsis                       | 12 (75.0)        | 21 (51.2)            | 0.201   |
| Multiple organ failure       | 2 (12.5)         | 13 (31.7)            | 0.006   |
| Bleeding/DIC                 | 1 (6.2)          | 4 (9.7)              | 0.373   |
| Respiratory failure          | 1 (6.2)          | 1 (2.4)              | 1.000   |
| Anoxic brain injury          | 0                | 2 (4.8)              | 0.499   |

Values are presented as number (%).

DIC, disseminated intravascular coagulation.
